# Supplementary material for: Photomechanical bending behavior of photochromic diarylethene crystals induced under polarized light
Source: Royal Society of Chemistry journal article supplement (doi:10.1039/c9ce00175a), 2019-01-01
Supplement: c9ce00175a1.pdf [file c9ce00175a1.pdf]

## Supporting Information

### **Photomechanical bending behavior of photochromic diarylethene crystals induced under polarized light**

*Akira Hirano, Daichi Kitagawa and Seiya Kobatake\**

*Department of Applied Chemistry, Graduate School of Engineering, Osaka City University, 3-3-138 Sugimoto, Sumiyoshi-ku, Osaka 558-8585, Japan.*

\*E-mail: kobatake@a-chem.eng.osaka-cu.ac.jp

## Contents

### Figures and Videos

**Table S1.** Crystallographic data for diarylethenes **1a** and **2a**.

**Figure S1.** Photomechanical bending behavior with non-polarized UV light and visible light for crystals **1a** (a) and **2a** (b).

**Figure S2.** (a) The definition of rotation angle  $\theta$  and absorption anisotropy of the closed-ring isomer in crystals **1a** (b) and **2a** (c).

**Figure S3.** Spectrum of the incident visible light.

**Video S1.** Photomechanical crystal bending behavior upon irradiation with UV light at  $\theta_{\min}$  from left side and following irradiation with white light from right side.

**Video S2.** Photomechanical crystal bending behavior upon irradiation with UV light at  $\theta_{\max}$  from left side followed by irradiation with visible light from right side.

**Video S3.** Photomechanical crystal bending behavior upon irradiation with UV light at  $\theta_{\min}$  from left side followed by irradiation with visible light from left side.

**Video S4.** Photomechanical crystal bending behavior upon irradiation with UV light at  $\theta_{\max}$  from left side followed by irradiation with visible light from left side.

**Table S1.** Crystallographic data for diarylethenes **1a** and **2a**.

|                                          | <b>1a</b>                                                                    | <b>2a</b>                                                                    |
|------------------------------------------|------------------------------------------------------------------------------|------------------------------------------------------------------------------|
| Formula                                  | C <sub>51</sub> H <sub>34</sub> F <sub>6</sub> O <sub>4</sub> S <sub>2</sub> | C <sub>29</sub> H <sub>22</sub> F <sub>6</sub> O <sub>2</sub> S <sub>2</sub> |
| Formula weight                           | 888.92                                                                       | 580.59                                                                       |
| Temperature / K                          | 138(2)                                                                       | 293(2)                                                                       |
| Crystal system                           | triclinic                                                                    | monoclinic                                                                   |
| Space group                              | <i>P</i> $\bar{1}$                                                           | <i>P</i> 2 <sub>1</sub> / <i>c</i>                                           |
| <i>a</i> / Å                             | 6.838(2)                                                                     | 18.727(4)                                                                    |
| <i>b</i> / Å                             | 15.416(6)                                                                    | 6.643(1)                                                                     |
| <i>c</i> / Å                             | 20.719(8)                                                                    | 21.459(4)                                                                    |
| $\alpha$ / °                             | 70.74(3)                                                                     | 90                                                                           |
| $\beta$ / °                              | 88.28(3)                                                                     | 101.035(3)                                                                   |
| $\gamma$ / °                             | 89.84(3)                                                                     | 90                                                                           |
| Volume / Å <sup>3</sup>                  | 2060.9(13)                                                                   | 2620.1(9)                                                                    |
| <i>Z</i>                                 | 2                                                                            | 4                                                                            |
| Density / g cm <sup>-3</sup>             | 1.432                                                                        | 1.472                                                                        |
| Goodness-of-fit on <i>F</i> <sup>2</sup> | 1.046                                                                        | 0.962                                                                        |
| <i>R</i> [ <i>I</i> > 2σ( <i>I</i> )]    | <i>R</i> <sub>1</sub> = 0.0442<br><i>wR</i> <sub>2</sub> = 0.0868            | <i>R</i> <sub>1</sub> = 0.0389<br><i>wR</i> <sub>2</sub> = 0.0878            |
| <i>R</i> (all data)                      | <i>R</i> <sub>1</sub> = 0.0864<br><i>wR</i> <sub>2</sub> = 0.0912            | <i>R</i> <sub>1</sub> = 0.0810<br><i>wR</i> <sub>2</sub> = 0.1019            |
| CCDC No.                                 | 942519                                                                       | 185945                                                                       |
| Reference                                | S1                                                                           | S2                                                                           |

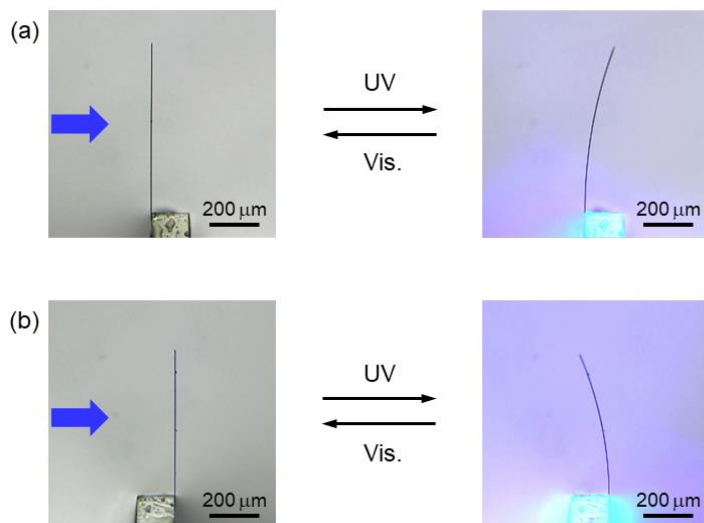

**Figure S1.** Photomechanical bending behavior with non-polarized UV light and visible light for crystals **1a** (a) and **2a** (b).

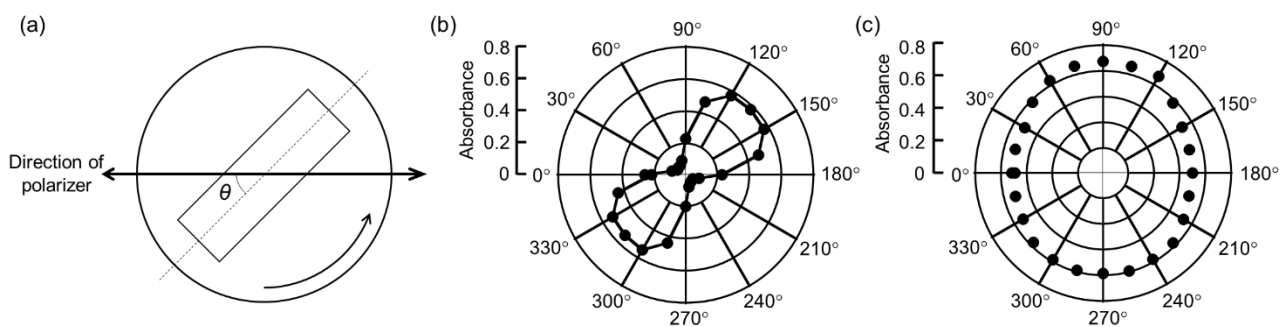

**Figure S2.** (a) The definition of rotation angle  $\theta$  and absorption anisotropy of the closed-ring isomer in crystals **1a** (b) and **2a** (c).

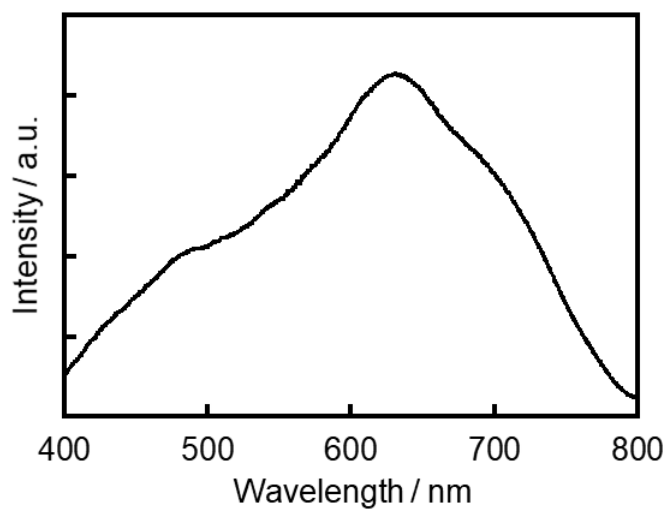

**Figure S3.** Spectrum of the incident visible light.

## Reference

S1 D. Kitagawa and S. Kobatake, *J. Phys. Chem. C*, **2013**, *117*, 20887–20892.

S2 M. Morimoto, S. Kobatake and M. Irie, *Chem.–Eur. J.*, **2003**, *9*, 621–627.
